# Supplementary figures and images for: Low incidence of pulmonary metastases in vulvar cancer patients: limited value of routine chest imaging based on a cohort study
Source: PubMed Central journal article supplement — BJOG. 2021 Jan 25;129(5):769–76. doi: 10.1111/1471-0528.16636 (PMC9290465; doi:10.1111/1471-0528.16636), 2021-01-25

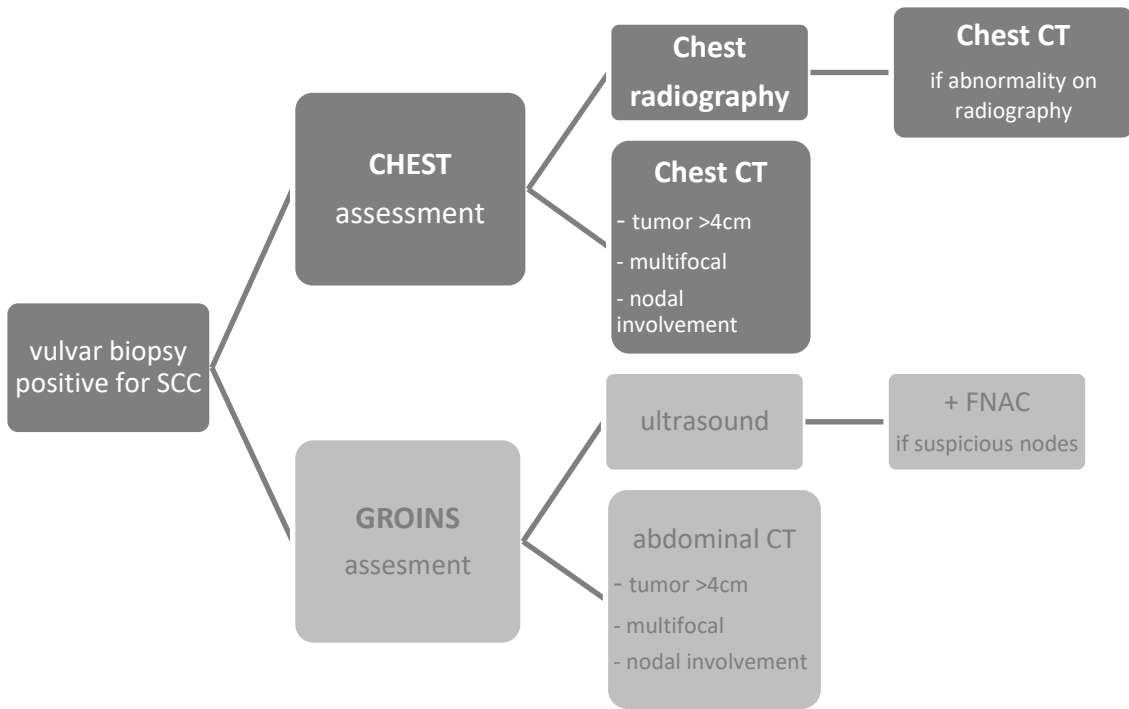

**Figure S1.** Diagnostic routing of patients with vulvar SCC  $\geq$ FIGO-stage IB.

Supplement: BJO-129-769-s001.pdf [file BJO-129-769-s001.pdf]
